# Supplementary material for: A new selection method to increase the health benefits of CVD prevention strategies
Source: PubMed Central journal article supplement — Eur J Prev Cardiol. 2018 Feb 7;25(6):642–50. doi: 10.1177/2047487317752948 (PMC5946653; doi:10.1177/2047487317752948), 2018-02-07
Supplement: Appendices.pdf [file Appendices.pdf]

## Appendices

|                                                              |    |
|--------------------------------------------------------------|----|
| 1. Detailed information on the different cohorts             | 2  |
| 1.1 – Baseline information                                   | 2  |
| 1.2 - Background information on Framingham Global Risk Score | 3  |
| 1.3 - Event distribution regarding different cohorts         | 3  |
| 2. Statistical performance                                   | 5  |
| 3. Information on the estimation of CVD burden               | 7  |
| 4. Information of the combined cohort                        | 9  |
| 5. CVD risk and CVD burden                                   | 11 |
| 6. Investigated scenarios                                    | 12 |
| 7. Gender differences                                        | 13 |
| 8. Differences in cohorts                                    | 16 |
| 9. CREW member list                                          | 20 |
| References                                                   | 21 |

## 1. Detailed information on the different cohorts

### 1.1 – Baseline information

Appendix 1 - Table 1 shows that individuals from SMART were less healthy and older compared to Morgen and Prospect participants. Moreover, they had significantly higher blood pressure, had diabetes more often, smoked more often and used more medication. On average, the values of the Morgen women regarding their CVD risk factors were slightly lower than the values for the Prospect women, except for smoking. The follow up time across cohorts varied widely because the SMART cohort is an ongoing cohort, whereas Morgen and Prospect are closed cohorts.

Appendix 1 - Table 1: Baseline table for the different cohorts

|                                      | SMART men            | SMART women          | Morgen men            | Morgen women          | Prospect women        |
|--------------------------------------|----------------------|----------------------|-----------------------|-----------------------|-----------------------|
| <i>Number individuals</i>            | 7088                 | 3557                 | 9153                  | 11270                 | 16401                 |
| <i>Age (SD)</i>                      | 58.22<br>(11.61)     | 55.31<br>(13.49)     | 43.32<br>(11.01)      | 42.49<br>(11.25)      | 57.62<br>(6.01)       |
| <i>Total cholesterol (SD)</i>        | 192.65<br>(51.32)    | 210.62<br>(55.82)    | 205.64<br>(41.35)     | 203.94<br>(40.78)     | 236.97<br>(41.38)     |
| <i>High density lipoprotein (SD)</i> | 44.88<br>(12.69)     | 56.24<br>(16.59)     | 45.88<br>(11.69)      | 58.32<br>(14.50)      | 57.58<br>(15.62)      |
| <i>Using preventive treatment</i>    | 44                   | 52%                  | 4%                    | 5%                    | 16%                   |
| <i>Systolic blood pressure (SD)</i>  | 141.26<br>(20.57)    | 142.16<br>(23.49)    | 125.02<br>(15.28)     | 117.89<br>(16.27)     | 133.15<br>(20.02)     |
| <i>Smoking</i>                       | 30%                  | 29%                  | 36%                   | 36%                   | 22%                   |
| <i>Diabetes</i>                      | 20%                  | 18%                  | 5%                    | 4%                    | 8%                    |
| <i>Follow up time (min-max)</i>      | 6.99<br>(0.00-17.49) | 7.22<br>(0.00-17.49) | 14.38<br>(0.04-17.97) | 14.93<br>(0.02-17.97) | 14.04<br>(0.01-17.51) |

## 1.2 - Background information on Framingham Global Risk Score

Appendix 1 - Table 2: Risk predictors

| <b>Risk factor</b>                           | <b>Description</b>                                  | <b>Unit</b>      | <b>FRS</b> |
|----------------------------------------------|-----------------------------------------------------|------------------|------------|
| Gender                                       | Gender of respondent                                | 0=male, 1=female | X          |
| Age                                          | Age at baseline (rounded)                           | Years            | X          |
| Total cholesterol (TC)                       | Baseline level, single measurement                  | mg/dL            | X          |
| High-density lipoprotein cholesterol (HDL-C) | One measurement                                     | mg/dL            | X          |
| Low-density lipoprotein cholesterol (LDL-C)  | One measurement                                     | mg/dL            |            |
| Systolic blood pressure (SBP)                | Average SBP of two measurements at baseline         | mmHg             | X          |
| Treatment (trt)                              | Use of medication for high blood pressure           | 0 = no, 1 = yes  | X          |
| Smoking (smok)                               | Current smoking status, former smoker is non-smoker | 0 = no, 1 = yes  | X          |
| Diabetes (diab)                              | Diabetes mellitus                                   | 0 = no, 1 = yes  | X          |

## 1.3 - Event distribution regarding different cohorts

Only events occurring within 10 years after recruitment were included in the analysis, because the timeline of the CVD risk prediction models used was 10 years. The event distribution varied hugely between the cohorts, for example, SMART individuals suffered more events resulting into a higher observed incidence rate per individual (Appendix 1 - Table 3). Moreover, the percentage fatal CVD events was higher for SMART individuals compared to Morgen and Prospect. There were also differences between men and women. Overall and per cohort, it can be seen that men suffered more non-fatal myocardial infarctions whereas women suffered more from strokes.

Appendix 1 - Table 3: Observed event distribution for the different cohorts

|                                      | ICD-10 code                 | FRS      | SMART men      | SMART women   | Morgen men     | Morgen women    | Prospect women |
|--------------------------------------|-----------------------------|----------|----------------|---------------|----------------|-----------------|----------------|
|                                      |                             |          | N              | N             | N              | N               | N              |
| <b>Morbidity</b>                     |                             |          |                |               |                |                 |                |
| Myocardial infarction (MI)           | I21,I22                     | <b>X</b> | 307<br>(32.8%) | 88<br>(31.5%) | 144<br>(19.6%) | 69<br>(15.2%)   | 173<br>(13.4%) |
| Other Coronary heart disease (OCHD)  | I20,I23,<br>I24,I25         | <b>X</b> | 0<br>(0%)      | 0<br>(0%)     | 290<br>(39.5%) | 158<br>(34.73%) | 455<br>(35.4%) |
| Cardiac arrest                       | I46,R96                     | <b>X</b> | 8<br>(0.9%)    | 1<br>(0.4%)   | 2<br>(0.3%)    | 2<br>(0.4%)     | 6<br>(0.5%)    |
| Ischemic stroke (CVAI)               | I63,I65                     | <b>X</b> | 240<br>(25.7%) | 97<br>(34.8%) | 64<br>(8.7%)   | 60<br>(13.2%)   | 195<br>(15.2%) |
| Hemorrhagic stroke (CVAH)            | I60,I61,I62                 | <b>X</b> | 0<br>(0%)      | 0<br>(0%)     | 13<br>(1.8%)   | 29<br>(6.4%)    | 55<br>(4.3%)   |
| Other stroke (OCVA)                  | I64,I66                     | <b>X</b> | 0<br>(0%)      | 0<br>(0%)     | 29<br>(4.0%)   | 19<br>(4.2%)    | 32<br>(2.5%)   |
| Other Cardiovascular diseases (OCVD) | G45,I67,I69,<br>I70-I74,I50 | <b>X</b> | 5<br>(0.5%)    | 8<br>(2.9%)   | 131<br>(17.8%) | 89<br>(19.6%)   | 250<br>(19.4%) |
| <b>Mortality</b>                     |                             |          |                |               |                |                 |                |
| Myocardial infarction (MI)           | I21,I22                     | <b>X</b> | 19<br>(2.0%)   | 6<br>(2.2%)   | 34<br>(4.6%)   | 11<br>(2.4%)    | 42<br>3.3%)    |
| Other Coronary heart disease (OCHD)  | I20,I23,I24                 | <b>X</b> | 0<br>(0%)      | 0<br>(0%)     | 5<br>(0.7%)    | 1<br>(0.2%)     | 5<br>(0.4%)    |
| Cardiac arrest, sudden death         | I46,R96                     | <b>X</b> | 138<br>(14.8%) | 34<br>(12.2%) | 10<br>(1.4%)   | 1<br>(0.2%)     | 19<br>(1.5%)   |
| Ischemic stroke (CVAI)               | I63,I65                     | <b>X</b> | 18<br>(1.9%)   | 5<br>(1.8%)   | 2<br>(0.3%)    | 1<br>(0.2%)     | 5<br>(0.4%)    |
| Hemorrhagic stroke (CVAH)            | I60,I61,I62                 | <b>X</b> | 0<br>(0%)      | 0<br>(0%)     | 2<br>(0.3%)    | 4<br>(0.9%)     | 9<br>(0.7%)    |
| Other stroke (OCVA)                  | I64,I66                     | <b>X</b> | 0<br>(0%)      | 0<br>(0%)     | 1<br>(0.1%)    | 2<br>(0.4%)     | 21<br>(1.6%)   |
| Other Cardiovascular diseases (OCVD) | G45,I67,I69,<br>I70-I74,I50 | <b>X</b> | 200<br>(21.3%) | 40<br>(14.3%) | 8<br>(1.1%)    | 9<br>(2.0%)     | 20<br>(1.6%)   |
| <i>Total number of</i>               |                             |          | 935            | 279           | 735            | 455             | 1287           |
| <i>Total individuals</i>             |                             |          | 7088           | 3557          | 9153           | 11270           | 16401          |
| <i>Prevalence events (%)</i>         |                             |          | 13.19          | 7.84          | 8.03           | 4.04            | 7.85           |

## 2. Statistical performance

Implementation of a prediction model typically follows updating or recalibration of the model in the target setting, as the target cohort may differ from the original development cohort <sup>1</sup>. Therefore, we recalibrated FRS to the MORGEN and PROSPECT cohorts to ensure that the models provide accurate risk estimates in these cohorts. For the survival data (time-to-event data) considered in this study, recalibrating a prediction model typically involves updating the baseline hazard and centering each predictor around the mean value of all patient characteristics (i.e. linear predictor) in our cohorts, for men and women separately <sup>2</sup>. Furthermore, we incorporated an additional correction factor to ensure that the updated baseline hazards actually reflect the observed probability of survival after 10 years. The regression coefficients of the risk factors of the original FRS model were not changed <sup>3</sup>.

Results of the updated values for the linear predictor and baseline hazard can be seen in Appendix 2 - Table 1 (column 2-5). Calibration and discrimination results according to the original and recalibrated model can be found in Appendix 2 - Table 1 (column 6-10). The performance of the subgroups of individuals is good and very similar, see the column "c-statistic". Moreover, the predicted number of events now closely matches the observed number of events. Furthermore, the calibration plots according to FRS for Morgen and Prospect cohort are shown below, see Appendix 2 - Figure 1 and Appendix 2 - Figure 2.

**Appendix 2 - Table 1: Statistical performance of FRS for cohort and gender**

|                | Linear predictor      |                           | Baseline hazard       |                           | Observed events | Expected events       |                           | C-statistic             |                           |
|----------------|-----------------------|---------------------------|-----------------------|---------------------------|-----------------|-----------------------|---------------------------|-------------------------|---------------------------|
|                | <i>Original model</i> | <i>Recalibrated model</i> | <i>Original model</i> | <i>Recalibrated model</i> |                 | <i>Original model</i> | <i>Recalibrated model</i> | <i>Original model</i>   | <i>Recalibrated model</i> |
| Morgen men     | 24.35                 | 23.44                     | 0.89                  | 0.92                      | 735             | 978                   | 735                       | 0.78<br>(0.75;<br>0.81) | 0.78<br>(0.75;<br>0.81)   |
| Morgen women   | 26.97                 | 25.57                     | 0.95                  | 0.96                      | 455             | 518                   | 455                       | 0.75<br>(0.70;<br>0.79) | 0.745<br>(0.70;<br>0.79)  |
| Prospect women | 26.97                 | 26.87                     | 0.95                  | 0.92                      | 1286            | 1989                  | 1286                      | 0.70<br>(0.67;<br>0.73) | 0.70<br>(0.67;<br>0.73)   |

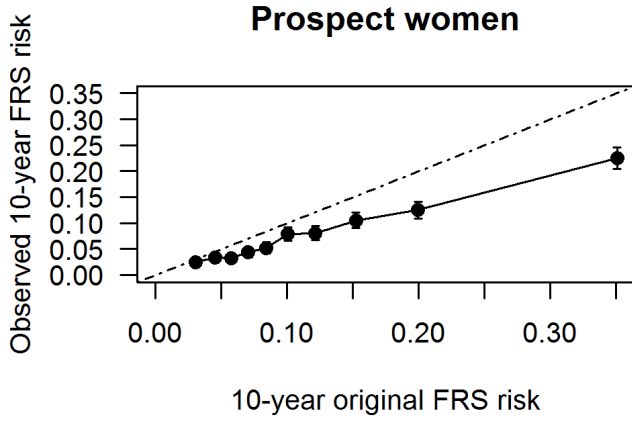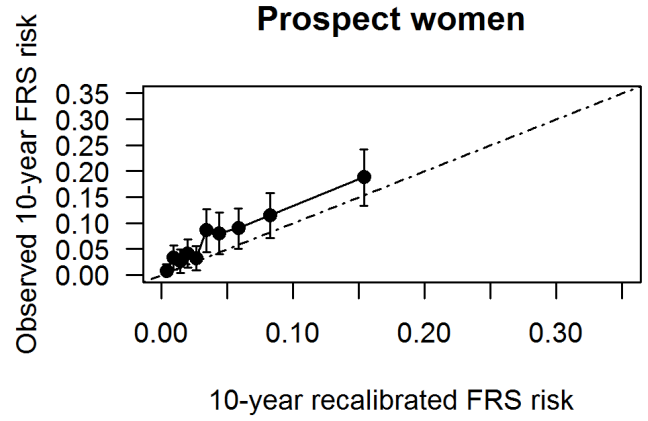

Appendix 2 - Figure 1: Calibration plot for Prospect individuals

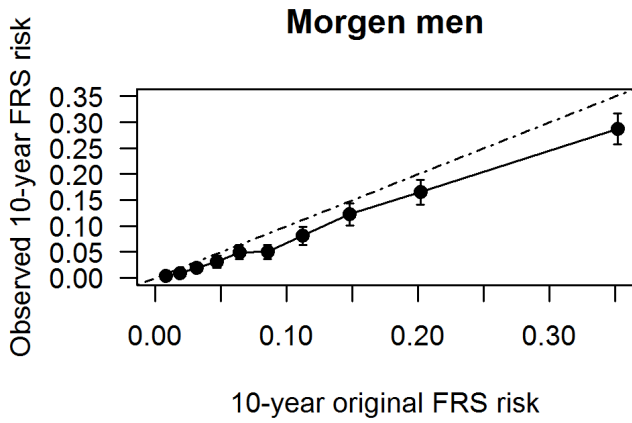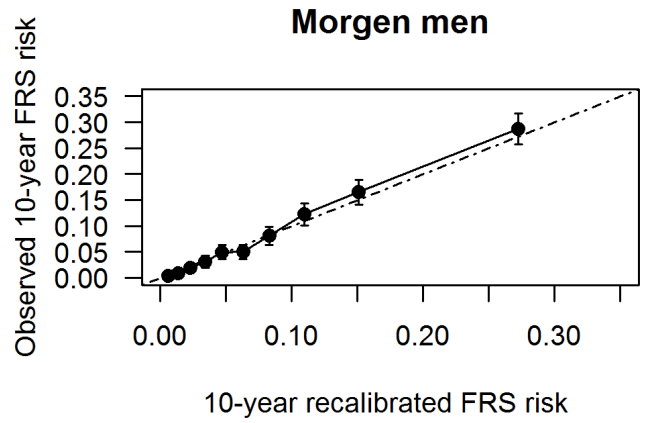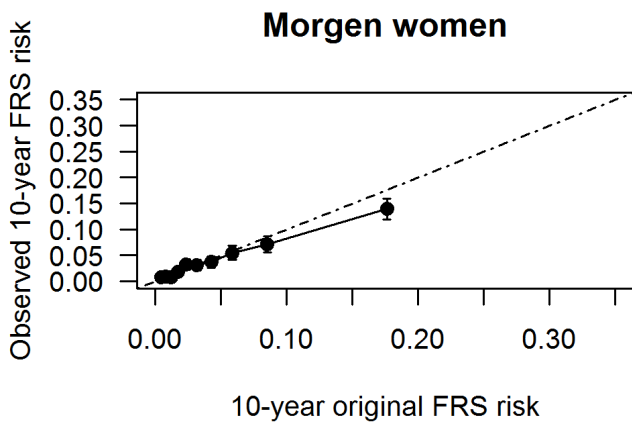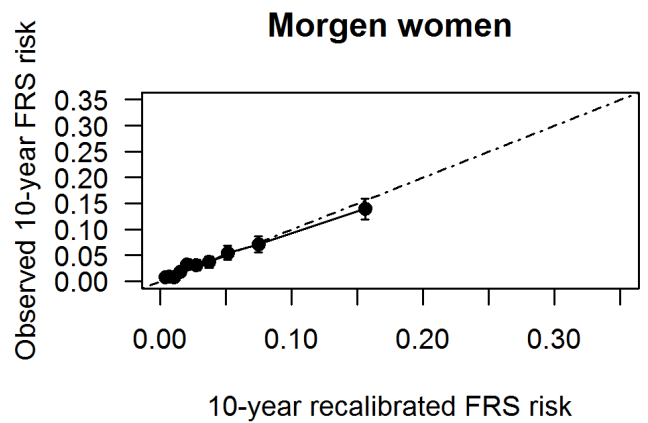

Appendix 2 - Figure 2: Calibration plot for Morgen individuals

### 3. Information on the estimation of CVD burden

The impact ( $I_{i,j}$ ), in terms of QALY loss, when an event predicted by model  $j$  occurs in individual  $i$  is given by

$$I_{i,j} = \left( \sum_{n=age_i}^{age_i+LE_i} QoL_n \right) * \sum_{k=1}^{\Theta} (\pi_{i,k,j} * (1 - u_k))$$

with the number of individual components  $\Theta$  under consideration, average life expectancy  $LE_i$  after surviving an event with remaining quality of life  $QoL_n$ , utility  $u_k$  and probability  $\pi_{i,k,j}$  that an event predicted by prediction model  $j$  is of a specific type  $k$ .

Here, the left component represents the remaining life years – adjusted for their quality – in the absence of CVD events. The right component represents the total expected loss in quality of life due to all predicted CVD events in model  $j$ . Note that  $\pi_{i,k,j}$  is zero for any type of event  $k$  not included in the composite endpoint of model  $j$ .

The baseline quality of life of individual  $i$  with age  $n$  is given by <sup>4,5</sup>

$$QoL_n = -0.00425 * n + 1.06$$

The formula for the expected CVD burden of disease ( $BD_{i,j}$ ) is given by

$$BD_{i,j} = I_{i,j} * r_{i,j}$$

where  $r_{i,j}$  is the recalibrated predicted risk for individual  $i$  and prediction model  $j$ .

For example, the CVD burden estimate of a 59 year old man was 0.9 QALYs, resulting from a 20.8% 10-year CVD risk and health related consequences equal to losing 4.2 QALYs when CVD events occurred. Here, the loss of 4.2 QALYs was calculated from a life expectancy of 20.4 years, adjusted for decrease in quality of life with age (first part of the impact equation), multiplied with the expected impact when a CVD event occurred (second part of the equation). This expected impact is the summation of the expected impact of all 14 CVD event types we observed in the data. For each event type, there was a disutility (Appendix 3 - Table 1) and marginal probability, i.e. the probability that a specific event type occurred given occurrence of CVD. All these 14 marginal probabilities summed up to 1 and were determined by dividing the number of observed events (for that event type) with the total number of observed event (all types). The marginal probabilities were determined per cohort and age group, and separate for gender.

Appendix 3 - Table 1: Utility values <sup>6</sup>

| Morbidity                           | Utility | Disutility |
|-------------------------------------|---------|------------|
| Myocardial infarction (MI)          | 0.88    | 0.12       |
| Other Coronary heart disease (OCHD) | 0.88    | 0.12       |
| Cardiac arrest                      | 0.81    | 0.19       |
| Ischemic stroke (CVAI)              | 0.63    | 0.37       |

|                                      |      |      |
|--------------------------------------|------|------|
| Hemorrhagic stroke (CVAH)            | 0.63 | 0.37 |
| Other stroke (OCVA)                  | 0.63 | 0.37 |
| Other Cardiovascular diseases (OCVD) | 0.68 | 0.32 |
| <b>Mortality</b>                     |      |      |
| All CVD event types                  | 0    | 1    |

Side effect of the preventive treatment were chosen as known as the side effects of statins, see Appendix 3 - Table 2 for details.

[Appendix 3 - Table 2: Side effects of preventive treatment <sup>7</sup>](#)

| <b>Side effect</b>              | <b>Probability</b> | <b>Health loss (utility)</b> |
|---------------------------------|--------------------|------------------------------|
| Minor                           | 0.18               | 2 days of lost life          |
| Major                           | 1/18000            | 14 days of lost life         |
| Death, given major side effects | 0.09               |                              |



#### 4. Information of the combined cohort

Appendix 4 - Table 1 shows baseline information of the combined cohort, separately for men and women. Although women were older and had higher total cholesterol, men were less healthy regarding the other risk factors. Men more often had diabetes, smoked more often, used more preventive treatment medication and had a slightly higher blood pressure. The event distribution for men and women varied substantially between men and women, as shown in Appendix 4 - Table 2. The percentage of non-fatal strokes was higher for women whereas men had more myocardial infarctions. Additionally, the percentage of observed fatal events in men was higher than in women.

**Appendix 4 - Table 1: Baseline characteristics of the combined cohort**

|                                      | Men                | Women              |
|--------------------------------------|--------------------|--------------------|
| <i>Number individuals</i>            | 16241              | 31228              |
| <i>Age (SD)</i>                      | 49.82 (13.48)      | 51.9 (11.65)       |
| <i>Total cholesterol (SD)</i>        | 199.97 (46.42)     | 222.05 (45.87)     |
| <i>High density lipoprotein (SD)</i> | 45.44 (12.14)      | 57.69 (15.35)      |
| <i>Using preventive treatment</i>    | 22%                | 16%                |
| <i>Systolic blood pressure (SD)</i>  | 132.11 (19.52)     | 128.67 (21.03)     |
| <i>Smoking</i>                       | 33%                | 28%                |
| <i>Diabetes</i>                      | 11%                | 7%                 |
| <i>Follow up Time (min-max)</i>      | 12.07 (0.00-17.97) | 13.58 (0.00-17.97) |

**Appendix 4 - Table 2: Observed event distribution for the combined cohort**

|                                      | Men (n=16241) |      | Women (n=31228) |      |
|--------------------------------------|---------------|------|-----------------|------|
|                                      | N             | %    | N               | %    |
| <b>Morbidity</b>                     |               |      |                 |      |
| Myocardial infarction (MI)           | 451           | 27   | 330             | 16.3 |
| Other Coronary heart disease (OCHD)  | 290           | 17.4 | 613             | 30.3 |
| Cardiac arrest                       | 10            | 0.6  | 9               | 0.4  |
| Ischemic stroke (CVAI)               | 304           | 18.2 | 352             | 17.4 |
| Hemorrhagic stroke (CVAH)            | 13            | 0.8  | 84              | 4.2  |
| Other stroke (OCVA)                  | 29            | 1.7  | 51              | 2.5  |
| Other Cardiovascular diseases (OCVD) | 136           | 8.1  | 347             | 17.2 |
| <b>Mortality</b>                     |               |      |                 |      |
| Myocardial infarction (MI)           | 53            | 3.2  | 59              | 2.9  |
| Other Coronary heart disease (OCHD)  | 5             | 0.3  | 6               | 0.3  |
| Cardiac arrest, sudden death         | 148           | 8.9  | 54              | 2.7  |
| Ischemic stroke (CVAI)               | 20            | 1.2  | 11              | 0.5  |
| Hemorrhagic stroke (CVAH)            | 2             | 0.1  | 13              | 0.6  |
| Other stroke (OCVA)                  | 1             | 0.1  | 23              | 1.1  |
| Other Cardiovascular diseases (OCVD) | 208           | 12.5 | 69              | 3.4  |

|                                                |       |       |
|------------------------------------------------|-------|-------|
| <i>Total number of events (up to 10 years)</i> | 1670  | 2021  |
| <i>Percentage fatal events</i>                 | 26.2% | 11.6% |
| <i>Prevalence events</i>                       | 10.3  | 6.5   |

## 5. CVD risk and CVD burden

The variation in CVD burden increases with CVD risk. Individuals with an absolute small CVD risk are similar, where high risk individuals have a large variation in CVD burden due to the health consequences of CVD events.

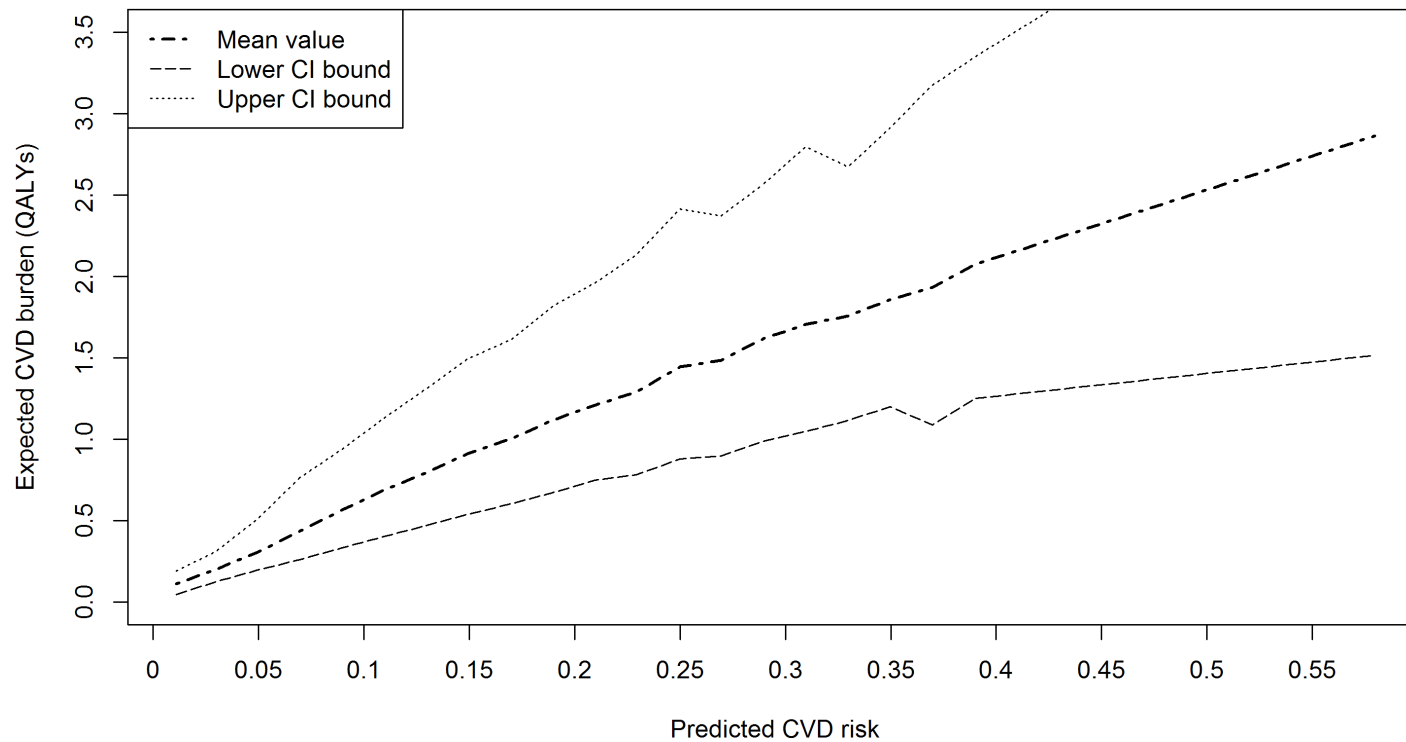

**Appendix 5 - Figure 1:** The average CVD burden estimates per risk group where all predicted risk estimates are divided in groups of 2% and plotted on 1%, 3%, etc. The dotted lines present the 5th- and 95th-percentile values of the burden estimates per risk group risks in each group and not the confidence intervals for the expected mean CVD risk estimates.

## 6. Investigated scenarios

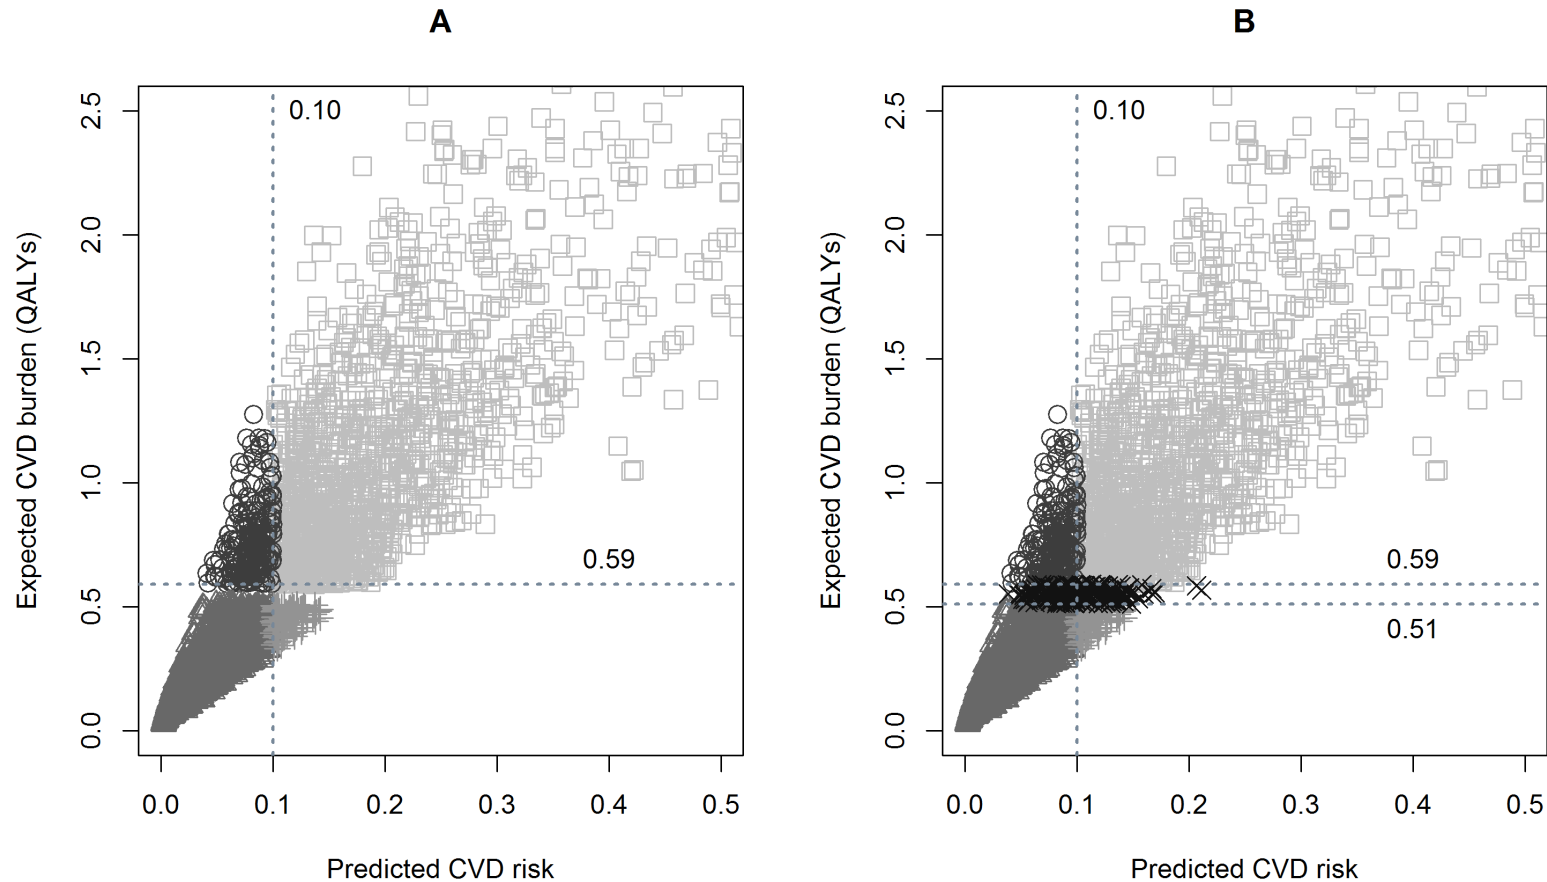

**Appendix 6 - Figure 1: Scatterplot of the predicted CVD risk and expected CVD burden. For clarity, only 10% of the individuals were plotted (random sample). Plot A shows the scenario 1 and 2, with individuals selected according to scenario 1 presented by the plus (+) and squared (□) signs, and individuals selected according to scenario 2 presented by the squared (□) and circle (○) signs (# individuals = 15.263). Plot B shows scenario 3 and 4, with individuals considered for scenario 3 presented by the plus (+), squared (□), and circle (○) signs, and individuals considered for scenario 4 presented by the cross (x), circle (○), and squared (□) signs. The grey dotted lines represent the risk threshold of 10%, and a burden threshold of 0.59 and 0.51 QALYs (only plot B).**

## 7. Gender differences

Results on the selection and impact part, separate for men and women, are shown in Appendix 7 - Table 1 and Appendix 7 - Table 2. The numbers in these tables correspond with **Error! Reference source not found.**, where columns "average risk" and "average CVD burden" corresponds with the values on the y axis of the bars in **Error! Reference source not found.**(upper and lower part). For example, men from the age group "35-45 years" have an average risk and burden of 0.15 and 1.25, based on scenario 1. Moreover, the increase in risk over age, shown in **Error! Reference source not found.**, can also be seen in the tables below, together with the difference in predicted risk for men and women. Men have on average a higher predicted CVD risk and burden for all age groups compared to women. Furthermore, Appendix 7 - Table 1 and Appendix 7 - Table 2 show that the percentage of selected individuals per age group increases with age, hence, selection of high risk individuals in general means selection of older individuals. Additionally, more older men are selected for preventive treatment compared to women from the same age group, for example, 82% vs 33% for age group "55-65" years of the men and women, respectively.

For scenario 2, i.e. burden based selection, the same number of individuals were selected but the percentage of man versus women and the percentages of selected individuals per age groups changes. There is an increase in the proportion of younger individuals and a decrease in the proportion of older individuals selected. The switch in selected individuals results in higher burden estimates for each age group and thus a health gain of 217 QALYs according to scenario 2 compared to scenario 1.

Apart from differences in CVD risk, and in the distribution of CVD event types, experienced by men and women, the reduction in health-related quality of life (i.e. disutility) when experiencing a particular CVD event may also be different for men and women. Technically, it is straightforward to account for different utilities of men and women in models such as the one used here. The same goes for gender-specific burden threshold values. However, the societal acceptance of such gender-specific threshold values for treatment requires further investigation of ethical and social considerations.

Appendix 7 - Table 1: Impact of statin treatment when selecting male individuals based on A) risk threshold of 10% and B) burden threshold of 0.59 QALYs according to FRS.

| MEN          | Selection               |                                |                     | Impact                                    |                                        |  | Selection           |                           |                                | Impact             |                                           |
|--------------|-------------------------|--------------------------------|---------------------|-------------------------------------------|----------------------------------------|--|---------------------|---------------------------|--------------------------------|--------------------|-------------------------------------------|
|              | A: Risk based selection | Total selected individuals (%) | Average CVD risk    | Average estimated CVD burden (QALYs loss) | With preventive treatment (QALYs loss) |  | Gain in QALYs       | B: Burden based selection | Total selected individuals (%) | Average CVD risk   | Average estimated CVD burden (QALYs loss) |
| 15-25        | 34 (4.9 %)              | 0.19                           | 1.95                | 1.27                                      | 0.68                                   |  | 51 (7.4%)           | 0.15                      | 1.57                           | 1.02               | 0.55                                      |
| 25-35        | 122 (6.6 %)             | 0.16                           | 1.42                | 0.92                                      | 0.5                                    |  | 207 (11.2%)         | 0.13                      | 1.13                           | 0.74               | 0.4                                       |
| 35-45        | 485 (15.2 %)            | 0.15                           | 1.25                | 0.81                                      | 0.44                                   |  | 910 (28.6%)         | 0.12                      | 1.00                           | 0.65               | 0.35                                      |
| 45-55        | 2221 (49.2 %)           | 0.17                           | 1.13                | 0.73                                      | 0.39                                   |  | 2521 (55.8%)        | 0.16                      | 1.09                           | 0.71               | 0.38                                      |
| 55-65        | 3127 (82.4 %)           | 0.21                           | 1.26                | 0.82                                      | 0.44                                   |  | 3019 (79.6%)        | 0.21                      | 1.3                            | 0.85               | 0.45                                      |
| 65-75        | 1777 (99.0 %)           | 0.34                           | 1.78                | 1.16                                      | 0.62                                   |  | 1762 (98.1%)        | 0.34                      | 1.8                            | 1.17               | 0.63                                      |
| 75-85        | 417 (100%)              | 0.54                           | 2.07                | 1.34                                      | 0.72                                   |  | 417 (100%)          | 0.54                      | 2.07                           | 1.34               | 0.72                                      |
| <i>Total</i> | <i>8182 (50.4%)</i>     | <i>0.24</i>                    | <i>11320 (1.38)</i> | <i>7362 (0.90)</i>                        | <i>3958 (0.48)</i>                     |  | <i>8887 (54.7%)</i> | <i>0.23</i>               | <i>11937 (1.34)</i>            | <i>7764 (0.87)</i> | <i>4174 (0.47)</i>                        |

Appendix 7 - Table 2: Impact of preventive treatment when selecting female individuals based on A) risk threshold of 10% and B) burden threshold of 0.59 QALYs according to FRS.

| <b>WOMEN</b>                               | Selection                                 |                     |                                                          | Impact                                                       |                        |                                              | Selection                                 |                     |                                                               | Impact                                                       |                        |
|--------------------------------------------|-------------------------------------------|---------------------|----------------------------------------------------------|--------------------------------------------------------------|------------------------|----------------------------------------------|-------------------------------------------|---------------------|---------------------------------------------------------------|--------------------------------------------------------------|------------------------|
| <b>A:<br/>Risk<br/>based<br/>selection</b> | Total<br>selected<br>individu-<br>als (%) | Average<br>CVD risk | Average<br>estimated<br>CVD<br>burden<br>(QALYs<br>loss) | With<br>preven-<br>tive<br>treat-<br>ment<br>(QALYs<br>loss) | Gain in<br>QALYs       | <b>B:<br/>Burden<br/>based<br/>selection</b> | Total<br>selected<br>individu-<br>als (%) | Average<br>CVD risk | Averag<br>e<br>estim<br>ated CVD<br>burden<br>(QALYs<br>loss) | With<br>preven-<br>tive<br>treat-<br>ment<br>(QALYs<br>loss) | Gain in<br>QALYs       |
| 15-25                                      | 30<br>(3.1%)                              | 0.18                | 2.1                                                      | 1.37                                                         | 0.74                   |                                              | 65<br>(6.7%)                              | 0.12                | 1.46                                                          | 0.95                                                         | 0.51                   |
| 20-35                                      | 59<br>(2.4%)                              | 0.16                | 1.55                                                     | 1.01                                                         | 0.54                   |                                              | 163<br>(6.5%)                             | 0.11                | 1.05                                                          | 0.68                                                         | 0.37                   |
| 35-45                                      | 154<br>(4.4%)                             | 0.15                | 1.95                                                     | 1.27                                                         | 0.68                   |                                              | 491<br>(13.9%)                            | 0.10                | 1.22                                                          | 0.80                                                         | 0.43                   |
| 45-55                                      | 12127<br>(11.3%)                          | 0.16                | 1.15                                                     | 0.75                                                         | 0.4                    |                                              | 1586<br>(14.7%)                           | 0.14                | 1.08                                                          | 0.70                                                         | 0.38                   |
| 55-65                                      | 3249<br>(33.1%)                           | 0.17                | 0.95                                                     | 0.62                                                         | 0.33                   |                                              | 2486<br>(25.4%)                           | 0.19                | 1.11                                                          | 0.72                                                         | 0.39                   |
| 65-75                                      | 2188<br>(64.3%)                           | 0.21                | 0.92                                                     | 0.6                                                          | 0.32                   |                                              | 1414<br>(41.5%)                           | 0.26                | 1.17                                                          | 0.76                                                         | 0.41                   |
| 75-85                                      | 184<br>(99.5%)                            | 0.41                | 1.19                                                     | 0.77                                                         | 0.42                   |                                              | 171<br>(92.4%)                            | 0.43                | 1.24                                                          | 0.81                                                         | 0.43                   |
| <i>Total</i>                               | <i>7081<br/>(22.7%)</i>                   | <i>0.19</i>         | <i>7191<br/>(1.02)</i>                                   | <i>4675<br/>(0.66)</i>                                       | <i>2516<br/>(0.36)</i> |                                              | <i>6376<br/>(20.4%)</i>                   | <i>0.19</i>         | <i>7195<br/>(1.13)</i>                                        | <i>4678<br/>(0.73)</i>                                       | <i>2517<br/>(0.39)</i> |

## 8. Differences in cohorts

Results on the selection and impact, separate for cohorts, are shown in Appendix 8 - Table 1, Appendix 8 - Table 2, and Appendix 8 - Table 3. The different combined cohorts have a large variation in risk estimates hence we used a relative risk threshold of 10% rather than an absolute risk threshold. In other words, individuals with the highest 10% risk and highest 10% burden estimates were selected and compared among each other.

Across all cohorts, the selection of high risk individuals, i.e. scenario 1, in general means selection of older individuals. Additionally, more men are selected for preventive treatment compared to women.

For scenario 2, i.e. relative burden threshold, exactly the same number of individuals was selected but the percentage of man versus women and the average age of the selected individuals changes. There is an increase in the proportion of younger individuals and women selected resulting in higher burden estimates for each cohort and thus a health gain of 109 (8.6%), 20 (2.6%), and 15 (2.4%) QALYs according to scenario 2 compared to scenario 1, according to the SMART, Morgen, and Prospect cohort.



Appendix 8 - Table 1: Impact of preventive treatment when selecting individuals from SMART cohort based on A) relative risk threshold of 10% and B) relative burden threshold of according to SMART risk score.

| <b>A: Scenario 1 - risk based strategy</b>    |                                |                  |                  |                           |                                   |                                        |                           |                   |
|-----------------------------------------------|--------------------------------|------------------|------------------|---------------------------|-----------------------------------|----------------------------------------|---------------------------|-------------------|
|                                               | <b>Selection</b>               |                  |                  |                           |                                   | <b>Impact</b>                          |                           |                   |
|                                               | Total selected individuals (%) | Average age (SD) | Average CVD risk | Expected number of events | Estimated CVD burden (QALYs lost) | With preventive treatment (QALYs lost) | Expected number of events | Gain in QALYs     |
| Men                                           | 868 (81.5%)                    | 70.6 (7.1)       | 0.63             | 545                       | 2698 (3.1)                        | 1754 (2.0)                             | 354                       | 944 (1.1)         |
| Women                                         | 197 (18.5%)                    | 70.1 (9.1)       | 0.61             | 120                       | 598 (3.0)                         | 389 (2.0)                              | 79                        | 209 (1.1)         |
| Men and Women                                 | 1065 (100%)                    | 70.5 (7.5)       | 0.62             | 666                       | 3296 (3.1)                        | 2143 (2.0)                             | 433                       | 1153 (1.1)        |
| <b>B: Scenario 2 - burden based selection</b> |                                |                  |                  |                           |                                   |                                        |                           |                   |
|                                               | <b>Selection</b>               |                  |                  |                           |                                   | <b>Impact</b>                          |                           |                   |
|                                               | Total selected individuals (%) | Average age (SD) | Average CVD risk | Expected number of events | Estimated CVD burden (QALYs lost) | With preventive treatment (QALYs lost) | Expected number of events | Gain in QALYs     |
| Men                                           | 841 (79.0%)                    | 65.0 (10.2)      | 0.59             | 497                       | 2810 (3.3)                        | 1827 (2.1)                             | 323                       | 983 (1.2)         |
| Women                                         | 224 (21.0%)                    | 57.7 (12.1)      | 0.48             | 107                       | 796 (3.6)                         | 518 (2.3)                              | 69                        | 279 (1.2)         |
| Men and Women                                 | 1065 (100%)                    | 63.5 (11.0)      | 0.53             | 603                       | 3606 (3.4)                        | 2345 (2.2)                             | 392                       | 1261 (1.2)        |
| Total difference                              |                                |                  |                  |                           |                                   |                                        |                           | <b>109 (8.6%)</b> |

Appendix 8 - Table 2: Impact of preventive treatment when selecting individuals from Morgen cohort based on A) relative risk threshold and B) relative burden threshold according to FRS.

| <b>A: Scenario 1 - risk based strategy</b>    |                            |                  |                  |                           |                                   |                                        |                           |                  |
|-----------------------------------------------|----------------------------|------------------|------------------|---------------------------|-----------------------------------|----------------------------------------|---------------------------|------------------|
|                                               | <b>Selection</b>           |                  |                  |                           |                                   | <b>Impact</b>                          |                           |                  |
|                                               | Total selected individuals | Average age (SD) | Average CVD risk | Expected number of events | Estimated CVD burden (QALYs lost) | With preventive treatment (QALYs lost) | Expected number of events | Gain in QALYs    |
| Men                                           | 1558 (76.2%)               | 55.1 (5.3)       | 0.23             | 351                       | 1656 (1.1)                        | 1077 (0.7)                             | 228                       | 580 (0.4)        |
| Women                                         | 485 (23.7%)                | 56.8 (4.7)       | 0.21             | 102                       | 500 (1.0)                         | 325 (0.7)                              | 67                        | 175 (0.4)        |
| Men and Women                                 | 2043 (100%)                | 55.5 (5.2)       | 0.22             | 454                       | 2156 (1.1)                        | 1402 (0.7)                             | 295                       | 755 (0.4)        |
| <b>B: Scenario 2 - burden based selection</b> |                            |                  |                  |                           |                                   |                                        |                           |                  |
|                                               | <b>Selection</b>           |                  |                  |                           |                                   | <b>Impact</b>                          |                           |                  |
|                                               | Total selected individuals | Average age (SD) | Average CVD risk | Expected number of events | Estimated CVD burden (QALYs lost) | With preventive treatment (QALYs lost) | Expected number of events | Gain in QALYs    |
| Men                                           | 1543 (75.5%)               | 52.6 (6.4)       | 0.22             | 340                       | 1687 (1.1)                        | 1096 (0.7)                             | 221                       | 590 (0.4)        |
| Women                                         | 500 (24.5%)                | 54.2 (6.2)       | 0.20             | 101                       | 528 (1.1)                         | 343 (0.7)                              | 66                        | 185 (0.4)        |
| Men and Women                                 | 2043 (100%)                | 53.0 (6.3)       | 0.21             | 441                       | 2215 (1.1)                        | 1496 (0.7)                             | 287                       | 775 (0.4)        |
| Total difference                              |                            |                  |                  |                           |                                   |                                        |                           | <b>20 (2.6%)</b> |

Appendix 8 - Table 3: Impact of preventive treatment when selecting individuals from Prospect cohort based on A) relative risk threshold and B) relative burden threshold according to FRS.

| <b>A: Scenario 1 - risk based strategy</b>    |                            |                  |                  |                           |                                   |                           |                           |                  |
|-----------------------------------------------|----------------------------|------------------|------------------|---------------------------|-----------------------------------|---------------------------|---------------------------|------------------|
|                                               | <b>Selection</b>           |                  |                  |                           |                                   | <b>Impact</b>             |                           |                  |
|                                               | Total selected individuals | Average age (SD) | Average CVD risk | Expected number of events | Estimated CVD burden (QALYs lost) | With preventive treatment | Expected number of events | Gain in QALYs    |
| Women                                         | 1641 (100%)                | 62.9 (5.2)       | 0.24             | 390                       | 1712 (1.0)                        | 1112 (0.68)               | 253                       | 599 (0.37)       |
| <b>B: Scenario 2 - burden based selection</b> |                            |                  |                  |                           |                                   |                           |                           |                  |
|                                               | <b>Selection</b>           |                  |                  |                           |                                   | <b>Impact</b>             |                           |                  |
|                                               | Total selected individuals | Average age (SD) | Average CVD risk | Expected number of events | Estimated CVD burden (QALYs lost) | With preventive treatment | Expected number of events | Gain in QALYs    |
| Women                                         | 1641 (100%)                | 60.6 (5.7)       | 0.23             | 380                       | 1753 (1.1)                        | 1139 (0.69)               | 247                       | 614 (0.37)       |
| Total difference                              |                            |                  |                  |                           |                                   |                           |                           | <b>15 (2.4%)</b> |

## 9. CREW member list

The consortium members consist of (in alphabetical order):

Yolande Appelman<sup>1</sup>, Sara Baart<sup>2,3</sup>, Laura Benschop<sup>2,3</sup>, Eric Boersma<sup>2</sup>, Laura Brouwers<sup>3,4</sup>, Ricardo P J Budde<sup>2</sup>, Suzanne C Cannegieter<sup>5</sup>, Veerle Dam<sup>3,6</sup>, Rene M J C Eijkemans<sup>6</sup>, Bart C J M Fauser<sup>4</sup>, Michel D Ferrari<sup>5</sup>, Arie Franx<sup>4</sup>, Christianne J M de Groot<sup>1</sup>, Marlise N Gunning<sup>3,4</sup>, Annemiek Hoek<sup>7</sup>, Hendrik Koffijberg<sup>6,8</sup>, Maria P H Koster<sup>2</sup>, Mark C Kruit<sup>5</sup>, Ghizelda R Lagerweij<sup>3,6</sup>, Cornelis B Lambalk<sup>1</sup>, Joop S E Laven<sup>2</sup>, Katie M Linstra<sup>2,3,5</sup>, Aad van der Lugt<sup>2</sup>, Angela H E M Maas<sup>9</sup>, Antoinette Maassen van den Brink<sup>2</sup>, Cindy Meun<sup>2,3</sup>, Saskia Middeldorp<sup>10</sup>, Karel G M Moons<sup>6</sup>, Bas B van Rijn<sup>4</sup>, Jeanine E Roeters van Lennep<sup>2</sup>, Jolien W Roos-Hesselink<sup>2</sup>, Luuk J J Scheres<sup>3,5,10</sup>, Yvonne T van der Schouw<sup>6</sup>, Eric A P Steegers<sup>2</sup>, Regine P M Steegers-Theunissen<sup>2</sup>, Gisela M Terwindt<sup>5</sup>, Birgitta K Velthuis<sup>4</sup>, Marieke J H Wermer<sup>5</sup>, Gerbrand A Zoet<sup>3,4</sup>

<sup>1</sup> VU University Medical Center, Amsterdam, the Netherlands

<sup>2</sup> Erasmus University Medical Center, Rotterdam, the Netherlands

<sup>3</sup> Netherlands Heart Institute, Utrecht, the Netherlands

<sup>4</sup> University Medical Center Utrecht, Utrecht, the Netherlands

<sup>5</sup> Leiden University Medical Center, Leiden, the Netherlands

<sup>6</sup> Julius Center, Utrecht, University Medical Center, Utrecht, the Netherlands

<sup>7</sup> University Medical Center Groningen, Groningen, the Netherlands

<sup>8</sup> University of Twente, Enschede, the Netherlands

<sup>9</sup> Radboud University Medical Center, Nijmegen, the Netherlands

<sup>10</sup> Academic Medical Center, Amsterdam, the Netherlands

## References

1. Nederlands Huisartsen Genootschap. Multidisciplinaire Richtlijn Cardiovasculair Risicomanagement 2011. Utrecht: Bohn Stafleu van Loghum.
2. Steyerberg EW, Vickers AJ, Cook NR, et al. Assessing the performance of prediction models: a framework for traditional and novel measures. *Epidemiology* 2010; 21: 128-138.
3. D'Agostino RB, Sr., Vasan RS, Pencina MJ, et al. General cardiovascular risk profile for use in primary care: the Framingham Heart Study. *Circulation* 2008; 117: 743-753.
4. Technology assessment report commissioned by the HTA Programme on behalf of The National Institute for Clinical Excellence. 2005. Available from <https://www.nice.org.uk/guidance/ta94/documents/assessment-report-coronary-heart-disease-statins2>
5. Kind P, Dolan P, Gudex C, et al. Variations in population health status: results from a United Kingdom national questionnaire survey. *Bmj* 1998; 316: 736-741.
6. Lipid Modification: Cardiovascular Risk Assessment and the Modification of Blood Lipids for the Primary and Secondary Prevention of Cardiovascular Disease. 2014. London: NICE.
7. Lee KK, Cipriano LE, Owens DK, et al. Cost-effectiveness of using high-sensitivity C-reactive protein to identify intermediate- and low-cardiovascular-risk individuals for statin therapy. *Circulation* 2010; 122: 1478-1487.
